# Supplementary material for: Stereochemical Study of the Super Large Tetrakis Alkaloid Alasmontamine A by Means of an Advanced Computational NMR
Source: MDPI journal article supplement (doi:10.3390/ijms24065572), 2023-03-14

*Supplementary Materials*

# **Stereochemical Study of the Super Large Tetrakis Alkaloid Alasmontamine A by Means of an Advanced Computational NMR**

## TABLE OF CONTENTS

|                                                                                                                                                                                                        |            |
|--------------------------------------------------------------------------------------------------------------------------------------------------------------------------------------------------------|------------|
| <b>Cartesian coordinates (Angstroms) of key configurations of alasmontamine A optimized at the M06-2X/aug-cc-pVDZ level in the liquid phase of methanol, modulated within the IEF-PCM scheme .....</b> | <b>S3</b>  |
| Compound: diastereomer «0».....                                                                                                                                                                        | S3         |
| Compound: diastereomer «15'».....                                                                                                                                                                      | S9         |
| Compound: diastereomer «15'''» .....                                                                                                                                                                   | S14        |
| <b>Figure S1. Integration probability distribution (%) of alternate diastereomers based on CMAE data.....</b>                                                                                          | <b>S19</b> |

**Cartesian coordinates (Angstroms) of key configurations of alasmontamine A optimized at the M06-2X/aug-cc-pVDZ level in the liquid phase of methanol, modulated within the IEF-PCM scheme:**

Compound: diastereomer «0»

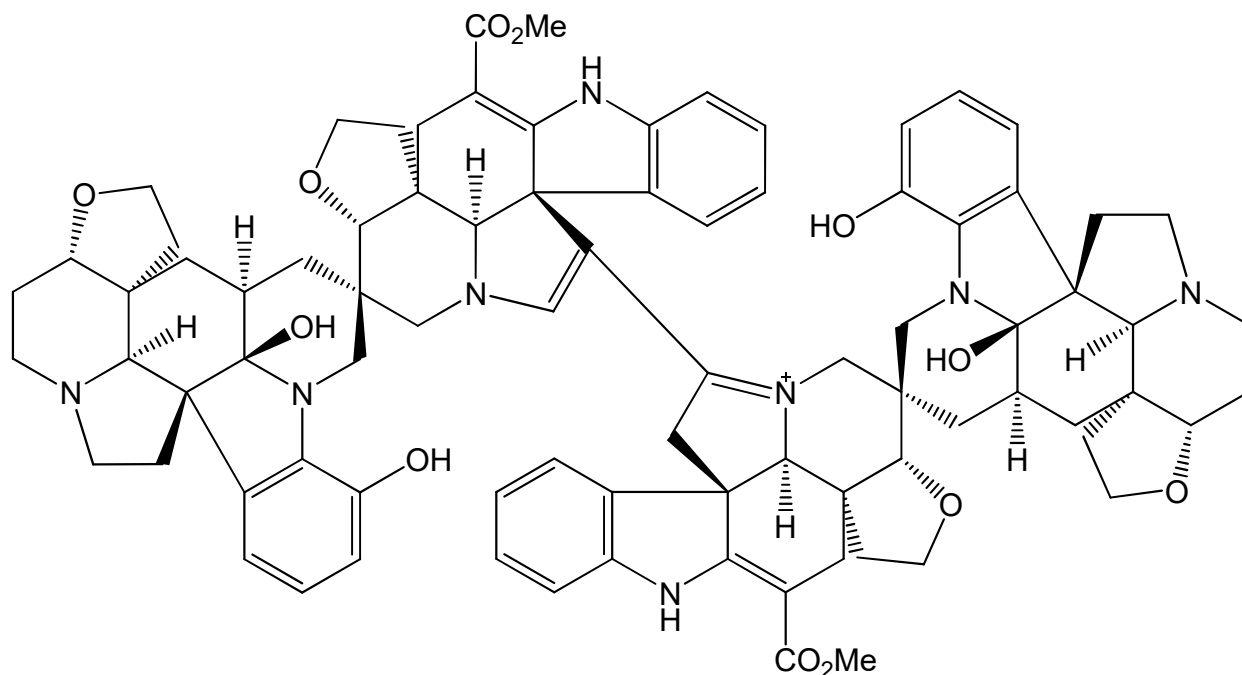

Imaginary frequencies: none

$E^0$ : -4595.1873024 a.u.

|   |              |              |              |
|---|--------------|--------------|--------------|
| N | -6.469236000 | -0.974674000 | 2.483841000  |
| C | -5.993793000 | -0.541149000 | 1.279537000  |
| C | -1.767896000 | 1.264250000  | -0.604795000 |
| N | -2.648759000 | 0.327001000  | 0.094932000  |
| C | -2.574431000 | -0.993994000 | -0.000847000 |
| C | -3.817697000 | -1.614627000 | 0.569250000  |
| C | -4.478135000 | -0.462855000 | 1.374619000  |
| C | -4.239007000 | -0.636317000 | 2.856495000  |
| C | -3.077322000 | -0.572441000 | 3.610159000  |
| C | -3.155101000 | -0.844527000 | 4.982488000  |
| C | -4.377154000 | -1.183550000 | 5.566640000  |
| C | -5.552922000 | -1.260039000 | 4.811748000  |
| C | -5.456906000 | -0.979425000 | 3.454591000  |
| C | -2.510989000 | 2.534253000  | -1.072824000 |

|   |               |              |              |
|---|---------------|--------------|--------------|
| C | -3.950993000  | 2.125250000  | -1.450755000 |
| C | -6.620978000  | -0.183074000 | 0.126588000  |
| C | -5.755026000  | 0.440004000  | -0.938723000 |
| C | -5.810148000  | 3.512329000  | -1.038860000 |
| C | -5.577631000  | 2.682279000  | 0.217835000  |
| C | -4.787689000  | 1.479767000  | -0.323530000 |
| C | -3.884009000  | 0.816329000  | 0.735610000  |
| C | -8.065118000  | -0.238254000 | -0.070252000 |
| C | -10.148213000 | -0.858520000 | 0.838669000  |
| N | -0.585709000  | 3.708290000  | -2.251081000 |
| C | -0.606098000  | 4.825985000  | -1.298859000 |
| C | 0.902731000   | 8.581462000  | 0.343870000  |
| N | 0.586288000   | 7.472008000  | -0.546542000 |
| C | 1.159255000   | 7.633013000  | -1.885924000 |
| C | 1.214904000   | 6.205985000  | -2.456628000 |
| C | 0.871916000   | 5.277372000  | -1.255018000 |
| C | 1.562594000   | 3.941604000  | -1.427529000 |
| C | 2.885049000   | 3.584149000  | -1.212455000 |
| C | 3.317246000   | 2.322201000  | -1.632380000 |
| C | 2.432165000   | 1.459776000  | -2.275748000 |
| C | 1.100062000   | 1.822550000  | -2.507449000 |
| C | 0.654388000   | 3.073788000  | -2.067658000 |
| C | 0.270747000   | 8.350272000  | 1.708270000  |
| C | 0.640490000   | 6.992195000  | 2.279427000  |
| C | -1.062003000  | 4.288936000  | 0.072670000  |
| C | -0.949626000  | 5.374390000  | 1.133153000  |
| C | 2.500999000   | 5.636432000  | 2.640024000  |
| C | 1.395179000   | 4.780600000  | 2.001959000  |
| C | 0.505205000   | 5.816204000  | 1.297996000  |
| C | 1.137148000   | 6.201877000  | -0.051819000 |
| C | -2.456684000  | 3.672337000  | -0.033681000 |
| C | -1.869186000  | 3.037665000  | -2.390562000 |
| N | -3.678023000  | -4.307303000 | -1.052576000 |
| C | -2.422541000  | -4.175071000 | -0.526811000 |
| C | 2.004207000   | -2.242752000 | -1.384805000 |
| N | 0.557777000   | -2.255524000 | -1.256573000 |
| C | -0.199619000  | -1.330688000 | -0.699243000 |
| C | -1.526445000  | -1.727650000 | -0.572032000 |
| C | -1.693215000  | -3.074686000 | -1.305375000 |
| C | -2.637998000  | -2.852000000 | -2.473532000 |
| C | -2.541846000  | -2.003135000 | -3.566257000 |
| C | -3.635661000  | -1.901079000 | -4.434624000 |
| C | -4.805243000  | -2.623975000 | -4.184275000 |
| C | -4.920002000  | -3.465618000 | -3.073152000 |

|   |              |              |              |
|---|--------------|--------------|--------------|
| C | -3.816263000 | -3.566494000 | -2.232893000 |
| C | 2.643174000  | -3.420529000 | -0.624732000 |
| C | 1.856796000  | -4.704485000 | -0.929868000 |
| C | -1.787453000 | -4.884753000 | 0.442804000  |
| C | -0.297271000 | -4.668833000 | 0.556771000  |
| C | 1.150958000  | -6.090808000 | -2.634559000 |
| C | -0.017648000 | -5.952633000 | -1.643056000 |
| C | 0.313270000  | -4.669664000 | -0.856135000 |
| C | -0.207108000 | -3.450743000 | -1.638565000 |
| C | -2.413096000 | -5.944022000 | 1.228849000  |
| C | -4.400829000 | -7.097082000 | 1.746049000  |
| N | 3.630242000  | -2.254913000 | 1.409745000  |
| C | 5.002806000  | -2.488867000 | 0.944275000  |
| C | 9.349836000  | -2.103978000 | 1.194086000  |
| N | 7.930568000  | -2.178373000 | 1.516332000  |
| C | 7.658204000  | -1.982483000 | 2.943208000  |
| C | 6.191685000  | -1.524367000 | 2.998491000  |
| C | 5.786112000  | -1.283099000 | 1.514196000  |
| C | 4.717452000  | -0.214260000 | 1.462546000  |
| C | 4.818781000  | 1.162265000  | 1.589997000  |
| C | 3.651571000  | 1.918855000  | 1.743186000  |
| C | 2.415380000  | 1.280122000  | 1.817493000  |
| C | 2.310300000  | -0.109133000 | 1.717481000  |
| C | 3.466650000  | -0.866509000 | 1.493606000  |
| C | 9.559219000  | -2.322937000 | -0.297551000 |
| C | 8.690857000  | -1.400372000 | -1.134597000 |
| C | 4.999326000  | -2.479116000 | -0.596298000 |
| C | 6.418564000  | -2.537106000 | -1.140570000 |
| C | 8.098885000  | 0.837564000  | -1.351248000 |
| C | 6.812065000  | -0.004620000 | -1.390097000 |
| C | 7.219826000  | -1.313921000 | -0.693991000 |
| C | 7.158048000  | -1.130119000 | 0.832069000  |
| C | 4.095722000  | -3.597958000 | -1.102694000 |
| C | 2.627814000  | -3.186887000 | 0.906116000  |
| H | -7.459165000 | -1.053624000 | 2.675490000  |
| H | -0.914149000 | 1.520225000  | 0.042139000  |
| H | -1.380028000 | 0.726734000  | -1.483079000 |
| H | -3.588129000 | -2.481442000 | 1.200993000  |
| H | -4.464119000 | -1.957383000 | -0.252140000 |
| H | -2.121504000 | -0.312537000 | 3.148143000  |
| H | -2.256319000 | -0.793909000 | 5.596605000  |
| H | -4.421034000 | -1.393494000 | 6.635907000  |
| H | -6.505914000 | -1.523123000 | 5.270771000  |
| H | -3.871031000 | 1.415720000  | -2.294781000 |

|   |               |              |              |
|---|---------------|--------------|--------------|
| H | -6.396218000  | 0.933730000  | -1.680972000 |
| H | -5.170155000  | -0.311089000 | -1.499228000 |
| H | -5.849540000  | 4.591027000  | -0.837044000 |
| H | -6.737220000  | 3.216656000  | -1.555100000 |
| H | -4.981559000  | 3.243443000  | 0.949694000  |
| H | -6.517675000  | 2.384220000  | 0.700389000  |
| H | -3.616912000  | 1.535608000  | 1.520064000  |
| H | -10.512564000 | -1.314759000 | 1.763735000  |
| H | -10.412108000 | -1.479456000 | -0.025848000 |
| H | -10.573067000 | 0.144502000  | 0.711691000  |
| H | 2.003616000   | 8.683597000  | 0.443820000  |
| H | 0.519688000   | 9.511658000  | -0.099943000 |
| H | 2.179820000   | 8.055563000  | -1.813601000 |
| H | 0.545875000   | 8.322685000  | -2.482638000 |
| H | 2.223428000   | 5.973238000  | -2.818939000 |
| H | 0.507950000   | 6.047062000  | -3.279198000 |
| H | 3.576905000   | 4.277712000  | -0.730092000 |
| H | 4.347000000   | 2.008072000  | -1.464048000 |
| H | 2.780381000   | 0.490292000  | -2.640181000 |
| H | 0.580536000   | 9.136425000  | 2.411404000  |
| H | -0.824712000  | 8.401968000  | 1.618128000  |
| H | 0.012643000   | 6.778631000  | 3.165221000  |
| H | -0.345616000  | 3.495977000  | 0.348729000  |
| H | -1.325969000  | 5.000534000  | 2.098286000  |
| H | -1.581349000  | 6.233653000  | 0.854080000  |
| H | 3.430658000   | 5.624345000  | 2.050237000  |
| H | 2.733953000   | 5.307921000  | 3.663524000  |
| H | 1.800605000   | 4.033259000  | 1.306897000  |
| H | 0.812089000   | 4.257269000  | 2.774785000  |
| H | 2.237138000   | 6.304283000  | 0.083170000  |
| H | -2.750022000  | 3.315951000  | 0.965077000  |
| H | -3.172376000  | 4.454712000  | -0.329749000 |
| H | -2.558137000  | 3.778031000  | -2.817285000 |
| H | -1.771022000  | 2.212137000  | -3.104195000 |
| H | -4.326221000  | -5.013225000 | -0.729122000 |
| H | 2.256601000   | -2.317803000 | -2.454753000 |
| H | 2.365094000   | -1.277489000 | -1.003449000 |
| H | 0.258305000   | -0.408786000 | -0.343300000 |
| H | -1.633108000  | -1.423106000 | -3.743969000 |
| H | -3.577671000  | -1.249591000 | -5.306251000 |
| H | -5.651429000  | -2.529337000 | -4.865692000 |
| H | -5.836199000  | -4.021253000 | -2.873879000 |
| H | 2.214984000   | -5.498538000 | -0.245498000 |
| H | 0.141308000   | -5.473514000 | 1.161396000  |

|   |              |              |              |
|---|--------------|--------------|--------------|
| H | -0.086128000 | -3.718387000 | 1.070294000  |
| H | 0.856627000  | -5.905686000 | -3.675986000 |
| H | 1.614914000  | -7.086126000 | -2.569828000 |
| H | -0.988239000 | -5.895018000 | -2.153420000 |
| H | -0.055603000 | -6.804926000 | -0.950045000 |
| H | -0.086529000 | -3.607751000 | -2.720380000 |
| H | -4.334117000 | -6.874228000 | 2.817968000  |
| H | -3.947672000 | -8.075671000 | 1.547137000  |
| H | -5.443221000 | -7.081077000 | 1.415160000  |
| H | 9.754119000  | -1.115575000 | 1.497730000  |
| H | 9.883907000  | -2.874050000 | 1.769300000  |
| H | 8.319525000  | -1.194737000 | 3.352541000  |
| H | 7.851644000  | -2.911353000 | 3.498375000  |
| H | 6.103402000  | -0.582328000 | 3.552789000  |
| H | 5.527660000  | -2.261485000 | 3.464781000  |
| H | 5.797273000  | 1.647622000  | 1.579782000  |
| H | 3.711060000  | 3.004254000  | 1.825416000  |
| H | 1.494595000  | 1.842595000  | 1.982050000  |
| H | 10.614762000 | -2.165574000 | -0.561354000 |
| H | 9.307763000  | -3.363077000 | -0.554429000 |
| H | 8.717529000  | -1.725559000 | -2.192151000 |
| H | 4.573136000  | -1.507086000 | -0.902319000 |
| H | 6.397886000  | -2.576973000 | -2.240871000 |
| H | 6.909982000  | -3.462157000 | -0.796129000 |
| H | 8.292818000  | 1.327579000  | -2.316676000 |
| H | 8.070062000  | 1.609447000  | -0.567807000 |
| H | 6.514744000  | -0.216994000 | -2.427706000 |
| H | 5.976824000  | 0.502186000  | -0.889076000 |
| H | 7.575586000  | -0.131692000 | 1.091317000  |
| H | 4.117069000  | -3.633565000 | -2.200747000 |
| H | 4.477252000  | -4.564587000 | -0.737872000 |
| H | 1.648108000  | -2.829358000 | 1.229826000  |
| H | 2.811839000  | -4.153788000 | 1.397870000  |
| H | -1.215286000 | 6.645663000  | -1.339545000 |
| H | 0.720655000  | 0.274047000  | -3.580442000 |
| H | 6.418206000  | -3.706002000 | 1.394286000  |
| H | 1.023901000  | -1.209556000 | 2.655127000  |
| O | -3.737376000 | -6.077741000 | 0.987656000  |
| O | 5.445555000  | -3.733053000 | 1.439041000  |
| O | 9.172803000  | -0.060152000 | -1.039655000 |
| O | 1.054558000  | -0.690449000 | 1.839878000  |
| O | -8.650081000 | 0.156418000  | -1.064625000 |
| O | -4.692911000 | 3.254161000  | -1.898791000 |
| O | -1.491034000 | 5.816241000  | -1.769934000 |

|   |              |              |              |
|---|--------------|--------------|--------------|
| O | 2.016509000  | 6.986108000  | 2.663244000  |
| O | -8.724308000 | -0.781886000 | 0.978978000  |
| O | 0.224959000  | 0.995703000  | -3.173329000 |
| O | 2.109813000  | -5.088918000 | -2.276277000 |
| O | -1.830740000 | -6.649323000 | 2.034400000  |



Compound: diastereomer «15'»

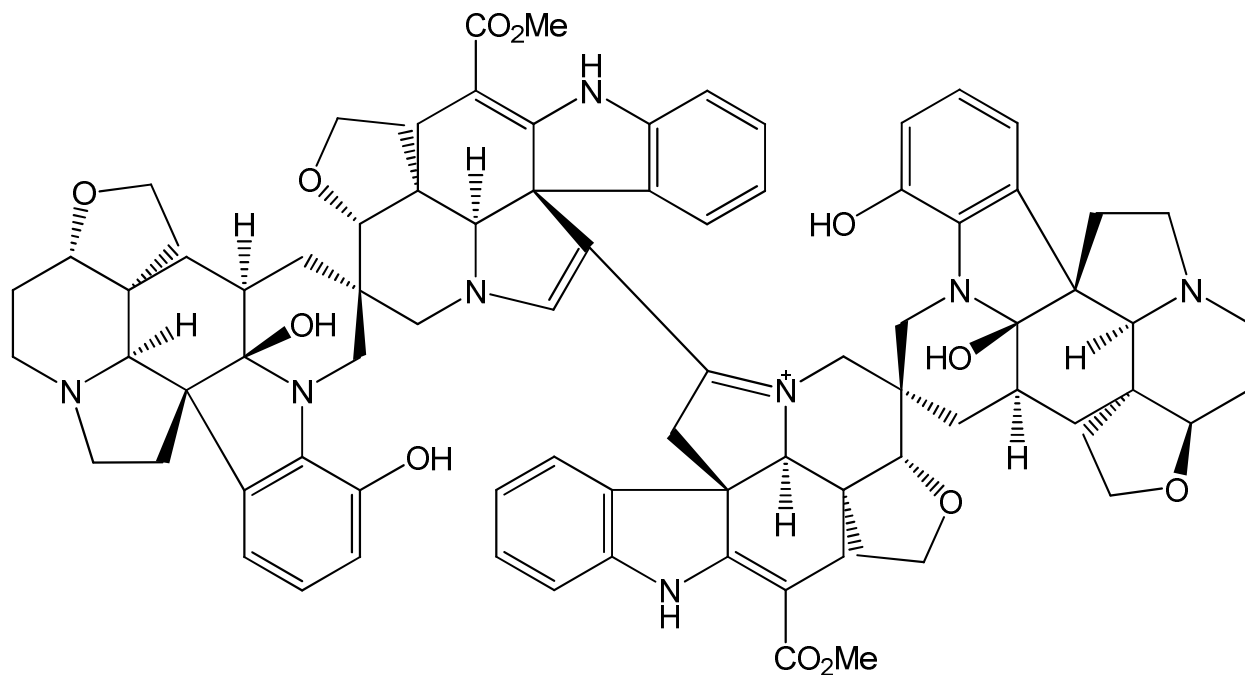

Imaginary frequencies: none

$E^0$ : -4595.1785102 a.u.

|   |               |              |              |
|---|---------------|--------------|--------------|
| N | -6.324883000  | -1.117801000 | 2.492651000  |
| C | -5.873088000  | -0.665000000 | 1.286331000  |
| C | -1.653724000  | 1.192790000  | -0.575915000 |
| N | -2.535875000  | 0.230403000  | 0.085443000  |
| C | -2.461987000  | -1.088791000 | -0.047047000 |
| C | -3.709996000  | -1.722436000 | 0.500300000  |
| C | -4.356196000  | -0.594613000 | 1.349649000  |
| C | -4.083722000  | -0.806701000 | 2.820774000  |
| C | -2.903870000  | -0.770771000 | 3.547145000  |
| C | -2.950696000  | -1.078055000 | 4.913740000  |
| C | -4.161353000  | -1.422851000 | 5.518256000  |
| C | -5.355761000  | -1.470135000 | 4.790499000  |
| C | -5.290516000  | -1.154934000 | 3.438934000  |
| C | -2.414596000  | 2.442271000  | -1.076156000 |
| C | -3.850146000  | 2.007352000  | -1.451208000 |
| C | -6.521461000  | -0.279263000 | 0.154193000  |
| C | -5.670861000  | 0.347550000  | -0.921879000 |
| C | -5.689473000  | 3.419818000  | -1.025171000 |
| C | -5.458533000  | 2.583861000  | 0.230021000  |
| C | -4.682960000  | 1.373859000  | -0.315238000 |
| C | -3.774282000  | 0.700714000  | 0.733136000  |
| C | -7.970378000  | -0.308312000 | -0.008464000 |
| C | -10.040475000 | -0.912043000 | 0.939094000  |
| N | -0.526372000  | 3.658682000  | -2.276528000 |

|   |              |              |              |
|---|--------------|--------------|--------------|
| C | -0.620896000 | 4.809878000  | -1.372020000 |
| C | 0.337391000  | 8.679953000  | 0.180226000  |
| N | 0.287188000  | 7.499828000  | -0.676419000 |
| C | 0.814788000  | 7.722359000  | -2.025717000 |
| C | 1.084396000  | 6.303891000  | -2.565657000 |
| C | 0.825014000  | 5.363834000  | -1.356017000 |
| C | 1.606614000  | 4.078009000  | -1.493297000 |
| C | 2.956196000  | 3.831339000  | -1.295405000 |
| C | 3.473261000  | 2.586223000  | -1.667659000 |
| C | 2.640249000  | 1.624825000  | -2.236617000 |
| C | 1.280489000  | 1.878126000  | -2.455514000 |
| C | 0.753488000  | 3.117367000  | -2.076412000 |
| C | -0.204880000 | 8.373399000  | 1.581494000  |
| C | 0.579195000  | 7.183761000  | 2.080390000  |
| C | -1.032627000 | 4.294589000  | 0.021751000  |
| C | -0.981260000 | 5.416927000  | 1.054699000  |
| C | 0.882175000  | 5.426625000  | 3.498980000  |
| C | 1.282438000  | 4.984700000  | 2.068687000  |
| C | 0.461124000  | 5.938848000  | 1.191380000  |
| C | 1.026613000  | 6.321390000  | -0.173594000 |
| C | -2.392873000 | 3.600522000  | -0.055869000 |
| C | -1.772312000 | 2.919732000  | -2.405190000 |
| N | -3.547878000 | -4.388238000 | -1.182543000 |
| C | -2.307323000 | -4.259409000 | -0.620929000 |
| C | 2.132988000  | -2.311198000 | -1.370662000 |
| N | 0.685525000  | -2.327910000 | -1.278598000 |
| C | -0.082074000 | -1.407858000 | -0.729038000 |
| C | -1.409577000 | -1.809802000 | -0.623002000 |
| C | -1.558471000 | -3.152151000 | -1.369575000 |
| C | -2.470209000 | -2.920144000 | -2.561611000 |
| C | -2.341086000 | -2.066217000 | -3.646692000 |
| C | -3.406244000 | -1.964656000 | -4.550238000 |
| C | -4.580569000 | -2.692980000 | -4.341082000 |
| C | -4.728560000 | -3.539871000 | -3.237715000 |
| C | -3.652930000 | -3.639679000 | -2.361568000 |
| C | 2.757157000  | -3.473587000 | -0.574157000 |
| C | 1.992337000  | -4.766394000 | -0.898474000 |
| C | -1.695733000 | -4.976077000 | 0.358483000  |
| C | -0.211581000 | -4.750274000 | 0.520346000  |
| C | 1.331051000  | -6.126462000 | -2.652731000 |
| C | 0.154515000  | -6.028721000 | -1.668227000 |
| C | 0.445265000  | -4.742046000 | -0.872576000 |
| C | -0.065556000 | -3.527690000 | -1.670420000 |
| C | -2.336976000 | -6.048992000 | 1.112788000  |

|   |               |              |              |
|---|---------------|--------------|--------------|
| C | -4.332749000  | -7.217462000 | 1.558912000  |
| N | 3.625446000   | -2.242110000 | 1.475055000  |
| C | 5.022401000   | -2.389993000 | 1.041176000  |
| C | 9.329242000   | -1.621939000 | 1.353613000  |
| N | 7.915121000   | -1.807101000 | 1.655372000  |
| C | 7.596482000   | -1.559606000 | 3.063905000  |
| C | 6.091743000   | -1.244076000 | 3.070677000  |
| C | 5.700254000   | -1.102163000 | 1.569004000  |
| C | 4.554991000   | -0.121182000 | 1.449318000  |
| C | 4.545234000   | 1.264096000  | 1.492737000  |
| C | 3.319076000   | 1.932709000  | 1.589515000  |
| C | 2.139066000   | 1.202956000  | 1.711550000  |
| C | 2.146673000   | -0.194838000 | 1.703219000  |
| C | 3.358907000   | -0.866415000 | 1.505197000  |
| C | 9.589583000   | -1.899906000 | -0.119907000 |
| C | 8.663007000   | -1.101840000 | -1.019934000 |
| C | 5.060959000   | -2.444793000 | -0.498818000 |
| C | 6.495615000   | -2.431248000 | -1.003629000 |
| C | 7.880156000   | 1.061241000  | -1.364286000 |
| C | 6.675729000   | 0.104899000  | -1.384364000 |
| C | 7.181843000   | -1.123323000 | -0.609379000 |
| C | 7.069535000   | -0.867551000 | 0.903815000  |
| C | 4.230428000   | -3.625027000 | -0.991290000 |
| C | 2.694909000   | -3.238297000 | 0.954018000  |
| H | -7.310759000  | -1.199305000 | 2.704025000  |
| H | -0.836146000  | 1.475064000  | 0.107155000  |
| H | -1.213870000  | 0.669450000  | -1.436322000 |
| H | -3.486244000  | -2.612261000 | 1.100749000  |
| H | -4.360333000  | -2.030406000 | -0.331694000 |
| H | -1.957948000  | -0.505036000 | 3.068961000  |
| H | -2.037291000  | -1.047802000 | 5.507080000  |
| H | -4.181758000  | -1.660110000 | 6.582406000  |
| H | -6.299281000  | -1.737922000 | 5.265548000  |
| H | -3.760558000  | 1.286390000  | -2.283858000 |
| H | -6.321992000  | 0.853072000  | -1.647054000 |
| H | -5.102685000  | -0.403502000 | -1.498143000 |
| H | -5.682154000  | 4.499652000  | -0.824062000 |
| H | -6.640186000  | 3.160659000  | -1.516213000 |
| H | -4.858811000  | 3.135886000  | 0.964645000  |
| H | -6.400216000  | 2.291234000  | 0.712466000  |
| H | -3.509678000  | 1.409098000  | 1.528543000  |
| H | -10.390038000 | -1.383809000 | 1.861814000  |
| H | -10.337870000 | -1.506574000 | 0.066964000  |
| H | -10.447736000 | 0.101940000  | 0.846704000  |

|   |              |              |              |
|---|--------------|--------------|--------------|
| H | 1.382059000  | 9.048680000  | 0.265772000  |
| H | -0.253451000 | 9.474889000  | -0.296073000 |
| H | 1.755839000  | 8.303094000  | -1.980268000 |
| H | 0.091945000  | 8.291171000  | -2.627801000 |
| H | 2.130173000  | 6.201919000  | -2.880703000 |
| H | 0.440087000  | 6.037194000  | -3.411425000 |
| H | 3.603247000  | 4.597969000  | -0.865183000 |
| H | 4.529427000  | 2.363579000  | -1.518288000 |
| H | 3.049659000  | 0.660677000  | -2.549312000 |
| H | -0.050357000 | 9.244726000  | 2.232545000  |
| H | -1.282301000 | 8.159269000  | 1.545714000  |
| H | 1.650049000  | 7.477573000  | 2.077583000  |
| H | -0.272700000 | 3.546320000  | 0.303257000  |
| H | -1.337067000 | 5.047297000  | 2.028224000  |
| H | -1.669307000 | 6.219346000  | 0.749833000  |
| H | 0.159910000  | 4.741748000  | 3.963695000  |
| H | 1.761404000  | 5.510146000  | 4.154109000  |
| H | 2.356584000  | 5.150588000  | 1.898677000  |
| H | 1.067244000  | 3.923163000  | 1.895043000  |
| H | 2.108955000  | 6.557575000  | -0.066391000 |
| H | -2.651832000 | 3.240984000  | 0.951594000  |
| H | -3.150582000 | 4.342752000  | -0.348245000 |
| H | -2.486652000 | 3.607034000  | -2.876323000 |
| H | -1.622782000 | 2.068952000  | -3.079270000 |
| H | -4.200288000 | -5.102746000 | -0.887173000 |
| H | 2.413815000  | -2.406575000 | -2.431469000 |
| H | 2.475390000  | -1.335360000 | -1.001680000 |
| H | 0.368606000  | -0.483543000 | -0.371245000 |
| H | -1.428963000 | -1.482634000 | -3.792251000 |
| H | -3.321184000 | -1.309551000 | -5.416752000 |
| H | -5.404560000 | -2.598569000 | -5.048969000 |
| H | -5.648091000 | -4.100638000 | -3.072003000 |
| H | 2.332725000  | -5.555161000 | -0.199499000 |
| H | 0.213874000  | -5.552281000 | 1.137373000  |
| H | -0.025522000 | -3.798719000 | 1.041046000  |
| H | 1.044934000  | -5.884471000 | -3.685128000 |
| H | 1.787160000  | -7.126859000 | -2.638925000 |
| H | -0.814078000 | -6.000322000 | -2.184404000 |
| H | 0.140762000  | -6.883937000 | -0.977692000 |
| H | 0.077366000  | -3.688152000 | -2.749008000 |
| H | -4.269731000 | -7.035684000 | 2.638435000  |
| H | -3.887533000 | -8.191852000 | 1.324987000  |
| H | -5.372889000 | -7.179546000 | 1.223182000  |
| H | 9.636961000  | -0.586172000 | 1.608786000  |

|   |              |              |              |
|---|--------------|--------------|--------------|
| H | 9.917114000  | -2.308193000 | 1.979909000  |
| H | 8.169690000  | -0.688966000 | 3.436506000  |
| H | 7.866779000  | -2.432053000 | 3.675162000  |
| H | 5.899096000  | -0.295652000 | 3.585942000  |
| H | 5.492668000  | -2.025121000 | 3.552853000  |
| H | 5.481045000  | 1.825714000  | 1.456934000  |
| H | 3.286853000  | 3.020958000  | 1.590991000  |
| H | 1.176463000  | 1.697537000  | 1.856655000  |
| H | 10.633232000 | -1.667086000 | -0.374269000 |
| H | 9.431975000  | -2.969607000 | -0.324165000 |
| H | 8.740669000  | -1.478299000 | -2.057681000 |
| H | 4.592689000  | -1.510906000 | -0.854426000 |
| H | 6.508059000  | -2.532402000 | -2.100022000 |
| H | 7.047181000  | -3.294030000 | -0.595409000 |
| H | 8.051607000  | 1.520134000  | -2.348852000 |
| H | 7.765481000  | 1.864178000  | -0.621051000 |
| H | 6.427915000  | -0.189020000 | -2.415043000 |
| H | 5.782441000  | 0.556160000  | -0.932152000 |
| H | 7.393481000  | 0.175402000  | 1.118030000  |
| H | 4.297280000  | -3.703957000 | -2.085048000 |
| H | 4.631438000  | -4.560066000 | -0.568842000 |
| H | 1.687795000  | -2.947756000 | 1.258135000  |
| H | 2.931959000  | -4.191561000 | 1.449554000  |
| H | -1.373699000 | 6.562036000  | -1.446206000 |
| H | 0.990082000  | 0.259768000  | -3.452458000 |
| H | 6.514724000  | -3.475654000 | 1.577234000  |
| H | 1.010447000  | -1.407714000 | 2.688682000  |
| O | -3.656096000 | -6.177064000 | 0.841925000  |
| O | 5.546423000  | -3.574242000 | 1.599259000  |
| O | 9.023168000  | 0.279317000  | -0.989903000 |
| O | 0.944719000  | -0.861646000 | 1.893362000  |
| O | -8.573516000 | 0.119683000  | -0.977906000 |
| O | -4.610248000 | 3.114968000  | -1.919381000 |
| O | -1.574860000 | 5.711956000  | -1.880362000 |
| O | 0.247446000  | 6.714106000  | 3.377189000  |
| O | -8.612058000 | -0.866327000 | 1.044007000  |
| O | 0.452444000  | 0.956312000  | -3.054981000 |
| O | 2.294218000  | -5.150867000 | -2.235083000 |
| O | -1.771539000 | -6.769887000 | 1.916659000  |

Compound: diastereomer «15'''»

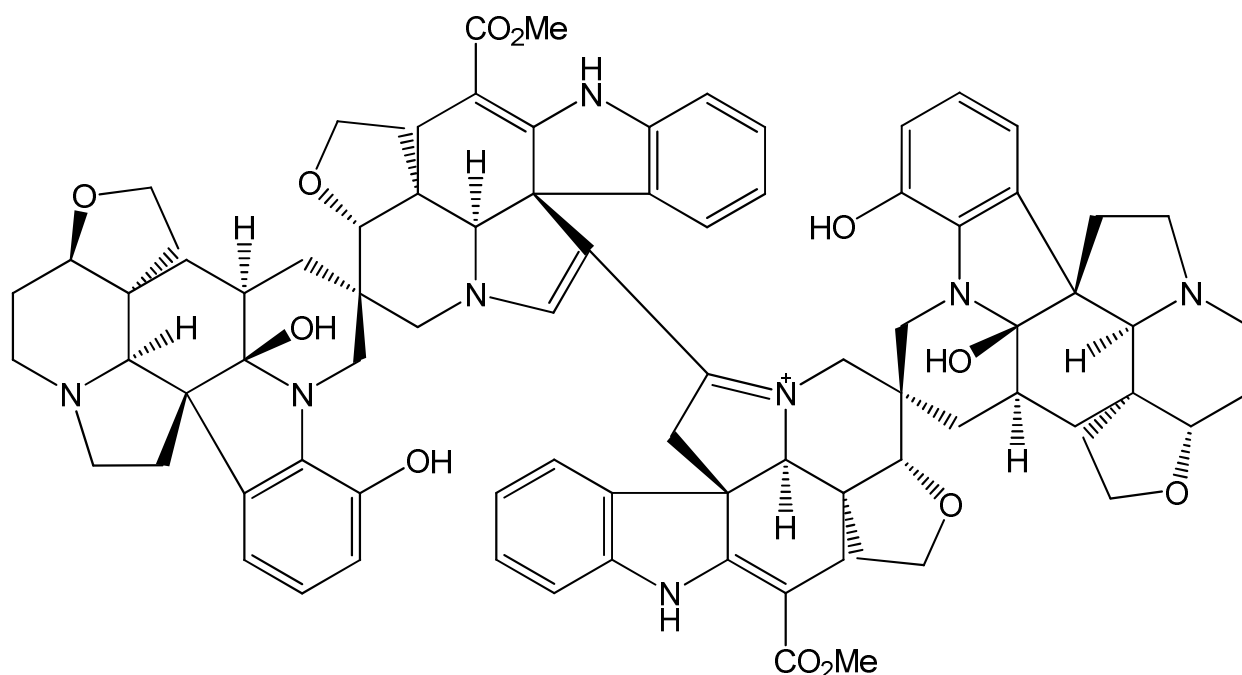

Imaginary frequencies: none

$E^0$ : -4595.1801423 a.u.

|   |               |              |              |
|---|---------------|--------------|--------------|
| N | -6.443495000  | -1.159540000 | 2.418538000  |
| C | -5.982738000  | -0.695756000 | 1.219573000  |
| C | -1.780904000  | 1.229930000  | -0.606550000 |
| N | -2.650953000  | 0.257099000  | 0.055397000  |
| C | -2.543084000  | -1.061376000 | -0.058590000 |
| C | -3.787490000  | -1.716088000 | 0.472661000  |
| C | -4.468412000  | -0.596407000 | 1.305665000  |
| C | -4.214994000  | -0.800046000 | 2.781437000  |
| C | -3.047651000  | -0.738974000 | 3.526028000  |
| C | -3.109019000  | -1.046446000 | 4.891943000  |
| C | -4.321386000  | -1.416481000 | 5.477766000  |
| C | -5.503033000  | -1.489695000 | 4.731499000  |
| C | -5.423545000  | -1.173787000 | 3.380906000  |
| C | -2.553225000  | 2.479678000  | -1.086837000 |
| C | -3.980726000  | 2.036087000  | -1.477974000 |
| C | -6.622388000  | -0.319064000 | 0.079565000  |
| C | -5.769465000  | 0.329401000  | -0.981751000 |
| C | -5.853362000  | 3.404306000  | -1.054504000 |
| C | -5.616593000  | 2.560982000  | 0.193780000  |
| C | -4.811621000  | 1.372684000  | -0.356770000 |
| C | -3.900710000  | 0.707949000  | 0.694296000  |
| C | -8.068222000  | -0.374292000 | -0.103383000 |
| C | -10.139849000 | -1.020137000 | 0.812350000  |
| N | -0.645254000  | 3.705368000  | -2.240676000 |

|   |              |              |              |
|---|--------------|--------------|--------------|
| C | -0.716370000 | 4.828644000  | -1.297129000 |
| C | 0.642185000  | 8.648531000  | 0.324483000  |
| N | 0.381995000  | 7.517660000  | -0.557463000 |
| C | 0.977835000  | 7.679407000  | -1.886729000 |
| C | 1.084802000  | 6.247721000  | -2.438230000 |
| C | 0.746422000  | 5.324446000  | -1.231344000 |
| C | 1.478707000  | 4.007444000  | -1.374466000 |
| C | 2.805036000  | 3.688097000  | -1.125880000 |
| C | 3.281708000  | 2.434392000  | -1.522811000 |
| C | 2.435676000  | 1.543501000  | -2.179916000 |
| C | 1.099973000  | 1.868620000  | -2.446823000 |
| C | 0.608824000  | 3.108695000  | -2.025577000 |
| C | -0.009376000 | 8.411967000  | 1.679333000  |
| C | 0.394157000  | 7.074611000  | 2.274573000  |
| C | -1.175844000 | 4.287864000  | 0.071962000  |
| C | -1.121098000 | 5.389342000  | 1.120961000  |
| C | 2.284407000  | 5.782602000  | 2.698535000  |
| C | 1.223109000  | 4.884333000  | 2.042119000  |
| C | 0.314915000  | 5.882425000  | 1.307044000  |
| C | 0.961295000  | 6.270630000  | -0.035057000 |
| C | -2.545206000 | 3.620439000  | -0.048468000 |
| C | -1.906776000 | 2.996967000  | -2.397489000 |
| N | -3.508182000 | -4.419181000 | -1.097517000 |
| C | -2.274567000 | -4.235541000 | -0.536055000 |
| C | 2.110186000  | -2.175920000 | -1.295224000 |
| N | 0.661984000  | -2.235388000 | -1.207085000 |
| C | -0.142152000 | -1.326017000 | -0.692909000 |
| C | -1.461216000 | -1.762585000 | -0.605432000 |
| C | -1.557040000 | -3.128926000 | -1.316801000 |
| C | -2.464654000 | -2.971371000 | -2.523945000 |
| C | -2.349677000 | -2.163685000 | -3.645384000 |
| C | -3.407417000 | -2.135909000 | -4.562861000 |
| C | -4.560538000 | -2.891365000 | -4.333467000 |
| C | -4.693924000 | -3.693968000 | -3.195660000 |
| C | -3.625673000 | -3.720456000 | -2.305534000 |
| C | 2.767192000  | -3.322075000 | -0.501525000 |
| C | 2.029819000  | -4.635913000 | -0.804611000 |
| C | -1.647655000 | -4.902223000 | 0.468623000  |
| C | -0.168243000 | -4.640489000 | 0.621728000  |
| C | 1.415032000  | -6.074170000 | -2.501040000 |
| C | 0.214745000  | -5.954807000 | -1.545020000 |
| C | 0.484141000  | -4.648382000 | -0.772760000 |
| C | -0.050101000 | -3.461077000 | -1.592983000 |
| C | -2.265804000 | -5.961724000 | 1.260314000  |

|   |               |              |              |
|---|---------------|--------------|--------------|
| C | -4.236358000  | -7.155050000 | 1.750370000  |
| N | 3.661136000   | -2.090712000 | 1.535778000  |
| C | 5.051931000   | -2.284479000 | 1.107279000  |
| C | 9.332437000   | -1.936851000 | 1.259431000  |
| N | 7.919251000   | -1.905716000 | 1.622056000  |
| C | 7.681213000   | -1.745935000 | 3.059287000  |
| C | 6.219420000   | -1.266406000 | 3.151870000  |
| C | 5.780661000   | -1.041333000 | 1.677388000  |
| C | 4.676470000   | -0.015279000 | 1.608367000  |
| C | 4.731332000   | 1.363854000  | 1.729096000  |
| C | 3.536338000   | 2.083219000  | 1.843307000  |
| C | 2.319919000   | 1.405185000  | 1.881616000  |
| C | 2.261076000   | 0.012262000  | 1.788349000  |
| C | 3.447354000   | -0.709349000 | 1.607312000  |
| C | 9.517472000   | -2.079193000 | -0.256279000 |
| C | 8.714521000   | -0.965263000 | -0.884379000 |
| C | 5.085873000   | -2.298393000 | -0.433462000 |
| C | 6.516343000   | -2.294101000 | -0.962077000 |
| C | 7.678918000   | 0.005674000  | -2.665113000 |
| C | 6.768591000   | 0.169240000  | -1.420533000 |
| C | 7.222490000   | -0.996665000 | -0.529009000 |
| C | 7.132731000   | -0.828157000 | 0.985029000  |
| C | 4.237208000   | -3.459092000 | -0.941271000 |
| C | 2.704613000   | -3.065648000 | 1.024565000  |
| H | -7.430770000  | -1.258073000 | 2.615581000  |
| H | -0.957561000  | 1.509724000  | 0.070146000  |
| H | -1.347878000  | 0.714681000  | -1.476152000 |
| H | -3.558762000  | -2.598196000 | 1.082170000  |
| H | -4.417838000  | -2.039259000 | -0.369217000 |
| H | -2.100417000  | -0.453511000 | 3.061977000  |
| H | -2.205802000  | -0.996724000 | 5.499365000  |
| H | -4.353369000  | -1.653547000 | 6.541672000  |
| H | -6.447836000  | -1.777346000 | 5.192179000  |
| H | -3.878495000  | 1.330523000  | -2.322224000 |
| H | -6.420196000  | 0.823140000  | -1.715333000 |
| H | -5.176398000  | -0.407800000 | -1.550695000 |
| H | -5.883317000  | 4.481258000  | -0.841399000 |
| H | -6.787096000  | 3.120701000  | -1.564587000 |
| H | -5.033179000  | 3.118474000  | 0.937635000  |
| H | -6.555853000  | 2.245326000  | 0.666318000  |
| H | -3.651754000  | 1.416929000  | 1.494109000  |
| H | -10.493452000 | -1.503734000 | 1.727364000  |
| H | -10.414379000 | -1.614574000 | -0.067296000 |
| H | -10.564088000 | -0.013104000 | 0.720248000  |



|   |              |              |              |
|---|--------------|--------------|--------------|
| H | 1.736611000  | 8.789945000  | 0.444808000  |
| H | 0.236805000  | 9.558994000  | -0.139660000 |
| H | 1.984684000  | 8.131000000  | -1.799252000 |
| H | 0.358098000  | 8.344819000  | -2.503930000 |
| H | 2.105922000  | 6.039917000  | -2.779372000 |
| H | 0.398373000  | 6.057877000  | -3.271469000 |
| H | 3.465608000  | 4.403816000  | -0.632344000 |
| H | 4.313679000  | 2.148364000  | -1.320495000 |
| H | 2.816435000  | 0.580518000  | -2.528630000 |
| H | 0.258451000  | 9.216687000  | 2.378407000  |
| H | -1.103979000 | 8.424146000  | 1.566746000  |
| H | -0.242312000 | 6.852473000  | 3.152119000  |
| H | -0.436397000 | 3.523869000  | 0.367228000  |
| H | -1.502502000 | 5.015141000  | 2.084042000  |
| H | -1.776995000 | 6.222509000  | 0.818886000  |
| H | 3.232807000  | 5.787383000  | 2.139447000  |
| H | 2.492948000  | 5.477819000  | 3.734427000  |
| H | 1.669053000  | 4.144800000  | 1.363994000  |
| H | 0.639341000  | 4.348473000  | 2.805499000  |
| H | 2.054798000  | 6.408006000  | 0.119504000  |
| H | -2.834527000 | 3.253048000  | 0.947528000  |
| H | -3.285185000 | 4.377163000  | -0.350509000 |
| H | -2.609402000 | 3.715358000  | -2.839303000 |
| H | -1.773859000 | 2.171495000  | -3.105576000 |
| H | -4.139460000 | -5.144028000 | -0.782122000 |
| H | 2.394470000  | -2.254845000 | -2.356741000 |
| H | 2.425405000  | -1.193679000 | -0.917098000 |
| H | 0.274807000  | -0.384155000 | -0.339803000 |
| H | -1.453569000 | -1.560843000 | -3.809634000 |
| H | -3.332850000 | -1.517842000 | -5.457096000 |
| H | -5.378764000 | -2.854770000 | -5.053290000 |
| H | -5.595923000 | -4.278421000 | -3.015449000 |
| H | 2.393426000  | -5.406446000 | -0.096815000 |
| H | 0.274506000  | -5.421476000 | 1.253447000  |
| H | 0.001880000  | -3.675660000 | 1.123280000  |
| H | 1.144173000  | -5.918740000 | -3.553347000 |
| H | 1.908605000  | -7.052296000 | -2.403810000 |
| H | -0.742080000 | -5.936637000 | -2.083533000 |
| H | 0.183288000  | -6.795534000 | -0.837810000 |
| H | 0.113160000  | -3.632133000 | -2.666951000 |
| H | -4.178368000 | -6.930887000 | 2.822190000  |
| H | -3.769947000 | -8.127815000 | 1.553925000  |
| H | -5.276748000 | -7.152497000 | 1.413311000  |
| H | 9.836665000  | -1.007694000 | 1.602162000  |

|   |              |              |              |
|---|--------------|--------------|--------------|
| H | 9.803799000  | -2.779038000 | 1.785281000  |
| H | 8.363594000  | -0.983332000 | 3.480981000  |
| H | 7.865728000  | -2.694556000 | 3.583492000  |
| H | 6.159648000  | -0.312635000 | 3.690348000  |
| H | 5.561177000  | -1.987290000 | 3.650352000  |
| H | 5.693839000  | 1.878455000  | 1.746668000  |
| H | 3.559099000  | 3.169918000  | 1.921124000  |
| H | 1.377050000  | 1.939551000  | 2.010767000  |
| H | 10.583122000 | -1.981837000 | -0.505200000 |
| H | 9.174147000  | -3.064435000 | -0.601748000 |
| H | 9.117915000  | -0.008960000 | -0.489359000 |
| H | 4.614896000  | -1.354271000 | -0.754686000 |
| H | 6.506523000  | -2.365275000 | -2.060084000 |
| H | 7.046779000  | -3.182710000 | -0.589684000 |
| H | 7.145644000  | -0.427166000 | -3.522223000 |
| H | 8.116764000  | 0.967249000  | -2.970435000 |
| H | 5.705796000  | 0.134231000  | -1.692294000 |
| H | 6.961393000  | 1.129647000  | -0.920096000 |
| H | 7.537519000  | 0.169823000  | 1.266574000  |
| H | 4.285521000  | -3.512190000 | -2.037635000 |
| H | 4.641482000  | -4.406004000 | -0.550713000 |
| H | 1.704295000  | -2.739412000 | 1.316066000  |
| H | 2.911036000  | -4.017267000 | 1.536631000  |
| H | -1.375794000 | 6.629163000  | -1.365908000 |
| H | 0.785089000  | 0.303898000  | -3.519189000 |
| H | 6.488173000  | -3.462983000 | 1.559814000  |
| H | 0.975357000  | -1.110942000 | 2.699913000  |
| O | -3.581728000 | -6.128214000 | 0.994480000  |
| O | 5.517754000  | -3.505947000 | 1.634332000  |
| O | 8.730817000  | -0.908103000 | -2.301119000 |
| O | 1.020176000  | -0.607058000 | 1.875779000  |
| O | -8.665629000 | 0.047502000  | -1.079042000 |
| O | -4.748548000 | 3.145061000  | -1.931012000 |
| O | -1.622351000 | 5.787714000  | -1.790985000 |
| O | 1.762345000  | 7.118039000  | 2.682070000  |
| O | -8.714039000 | -0.949247000 | 0.937313000  |
| O | 0.263117000  | 1.015808000  | -3.128119000 |
| O | 2.330894000  | -5.034907000 | -2.136649000 |
| O | -1.685497000 | -6.640594000 | 2.089764000  |

**Figure S1.** Integration probability distribution (%) of alternate diastereomers based on CMAE data.

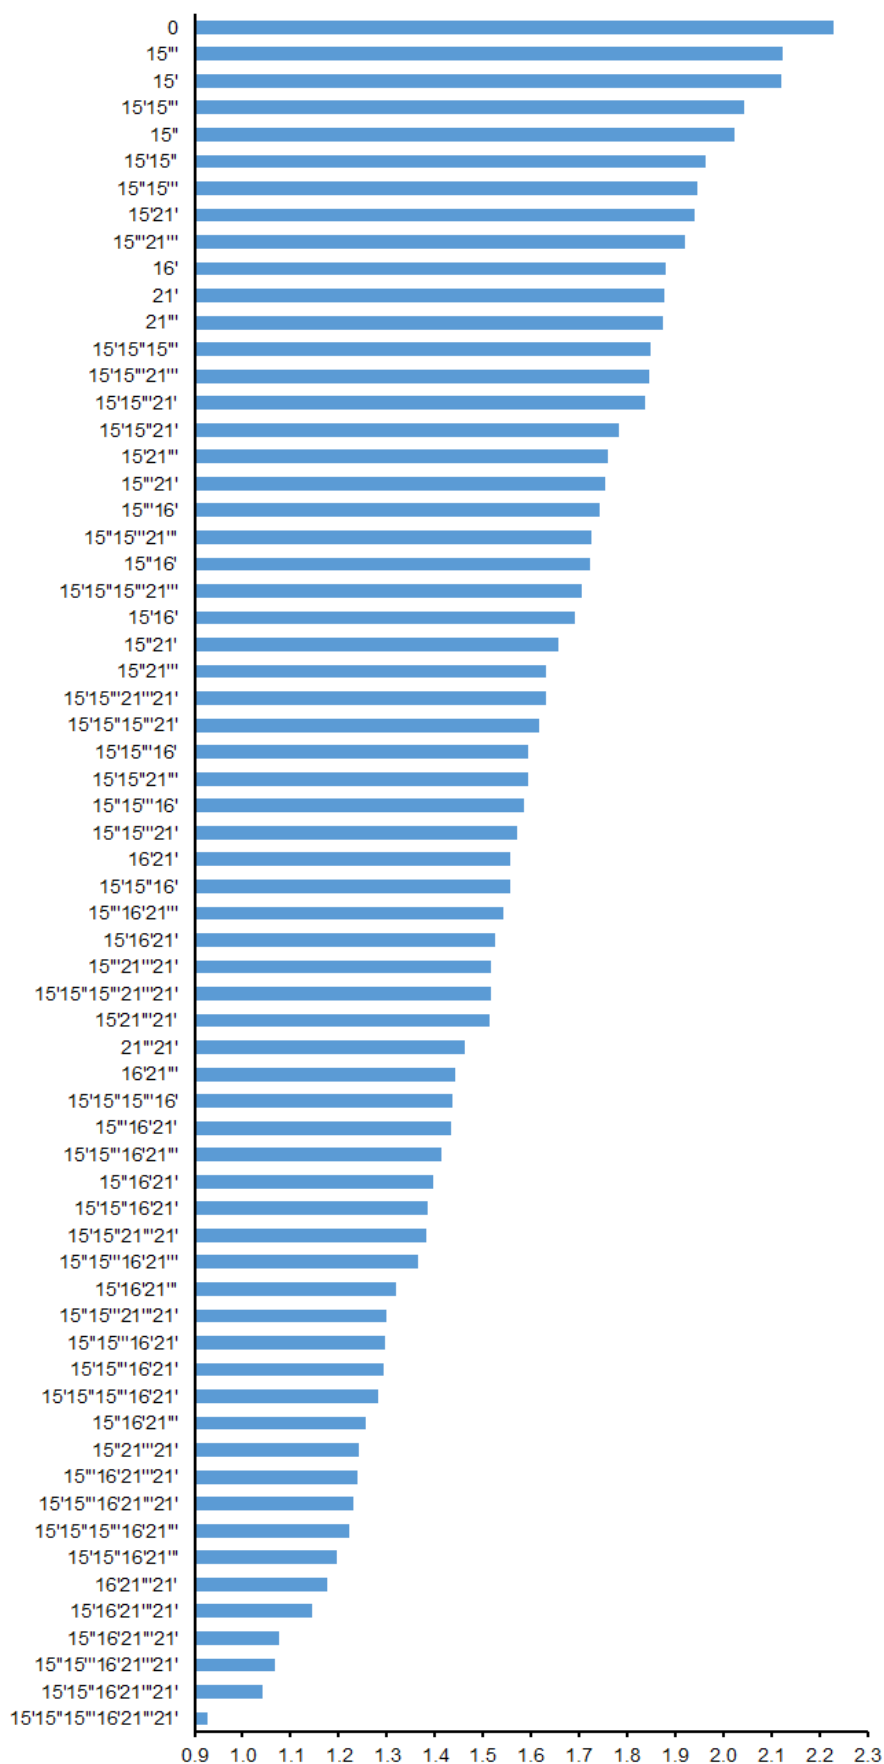

Supplement: s1 [file s1]
